# Supplementary material for: Synthesis of bimetallic nickel cobalt selenide particles for high-performance hybrid supercapacitors
Source: Royal Society of Chemistry journal article supplement (doi:10.1039/d1ra08678b), 2022-01-01
Supplement: d1ra08678b1.pdf [file d1ra08678b1.pdf]

## **Synthesis of bimetallic nickel cobalt selenide particles for high-performance hybrid supercapacitors**

Bei Jiang,<sup>a,b</sup> Yang Liu,<sup>a,b</sup> Jingchao Zhang,<sup>b</sup> Yinhuan Wang,<sup>b</sup> Xinyu Zhang,<sup>b</sup> Renchun Zhang,<sup>b</sup> Liang-Liang Huang,<sup>a\*</sup> Daojun Zhang<sup>b\*</sup>

<sup>a</sup> School of Chemistry and Material Science, Liaoning Shihua University, Fushun 113001, Liaoning, P. R. China. E-mail: huangll@lnpu.edu.cn

<sup>b</sup> College of Chemistry and Chemical Engineering, Anyang Normal University, Anyang 455000, Henan, China. E-mail: zhangdj0410@sohu.com

### **2.6 Physical Characterization Techniques**

The morphology of the series of nickel cobalt selenide particles are characterized by field-emission scanning electron microscopy (FESEM, HITACHI, SU8010) and transmission electron microscopy (TEM, FEI TECNAI G2 TF20). X-ray diffraction (XRD) of these samples were obtained on a PANalytical X-ray diffractometer. X-ray photoelectron spectroscopy (XPS, Thermo 250Xi) is used to study the chemical valence states of the best performed  $\text{Ni}_{0.95}\text{Co}_{2.05}\text{Se}_4$  sample.

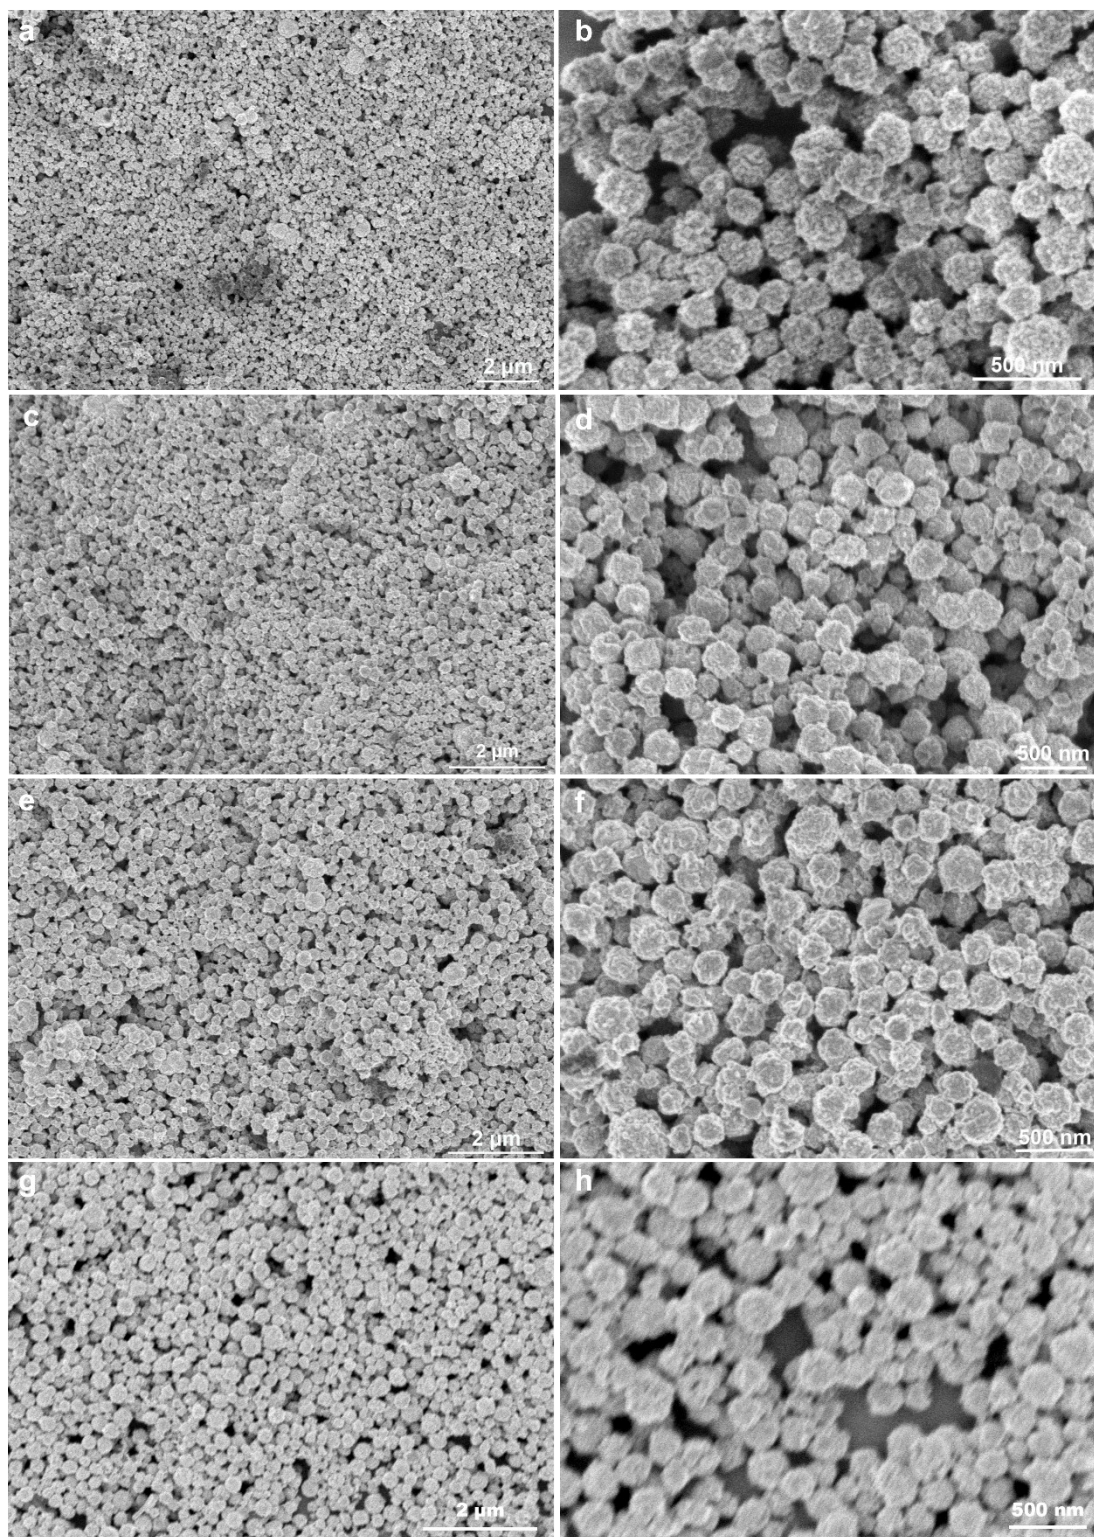

Fig. S1. SEM images of different samples. (a-b)  $\text{Co}_3\text{Se}_4$ , (c-d)  $\text{Ni}_{1.14}\text{Co}_{1.86}\text{Se}_4$ , (e-f)  $\text{Ni}_{0.67}\text{Co}_{2.33}\text{Se}_4$ , (g-h)  $\text{Ni}_{0.53}\text{Co}_{2.47}\text{Se}_4$ .

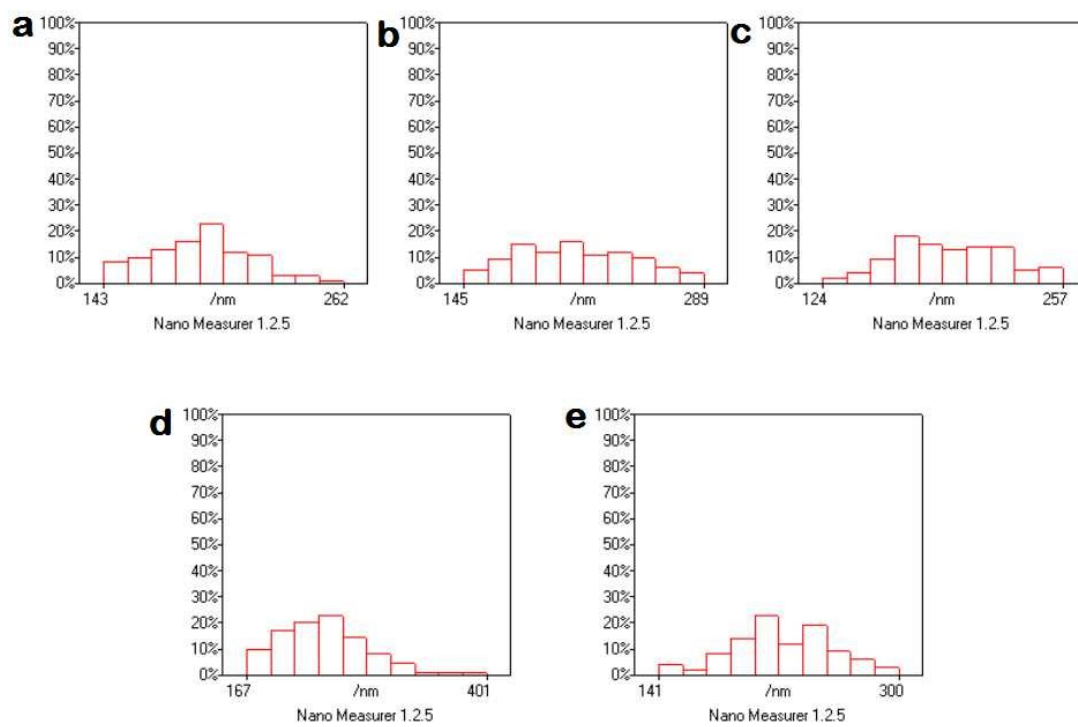

Fig. S2. A column chart of the size distribution of different samples. (a)  $\text{Co}_3\text{Se}_4$ , (b)  $\text{Ni}_{1.14}\text{Co}_{1.86}\text{Se}_4$ , (c)  $\text{Ni}_{0.95}\text{Co}_{2.05}\text{Se}_4$ , (d)  $\text{Ni}_{0.67}\text{Co}_{2.33}\text{Se}_4$ , (e)  $\text{Ni}_{0.53}\text{Co}_{2.47}\text{Se}_4$ .

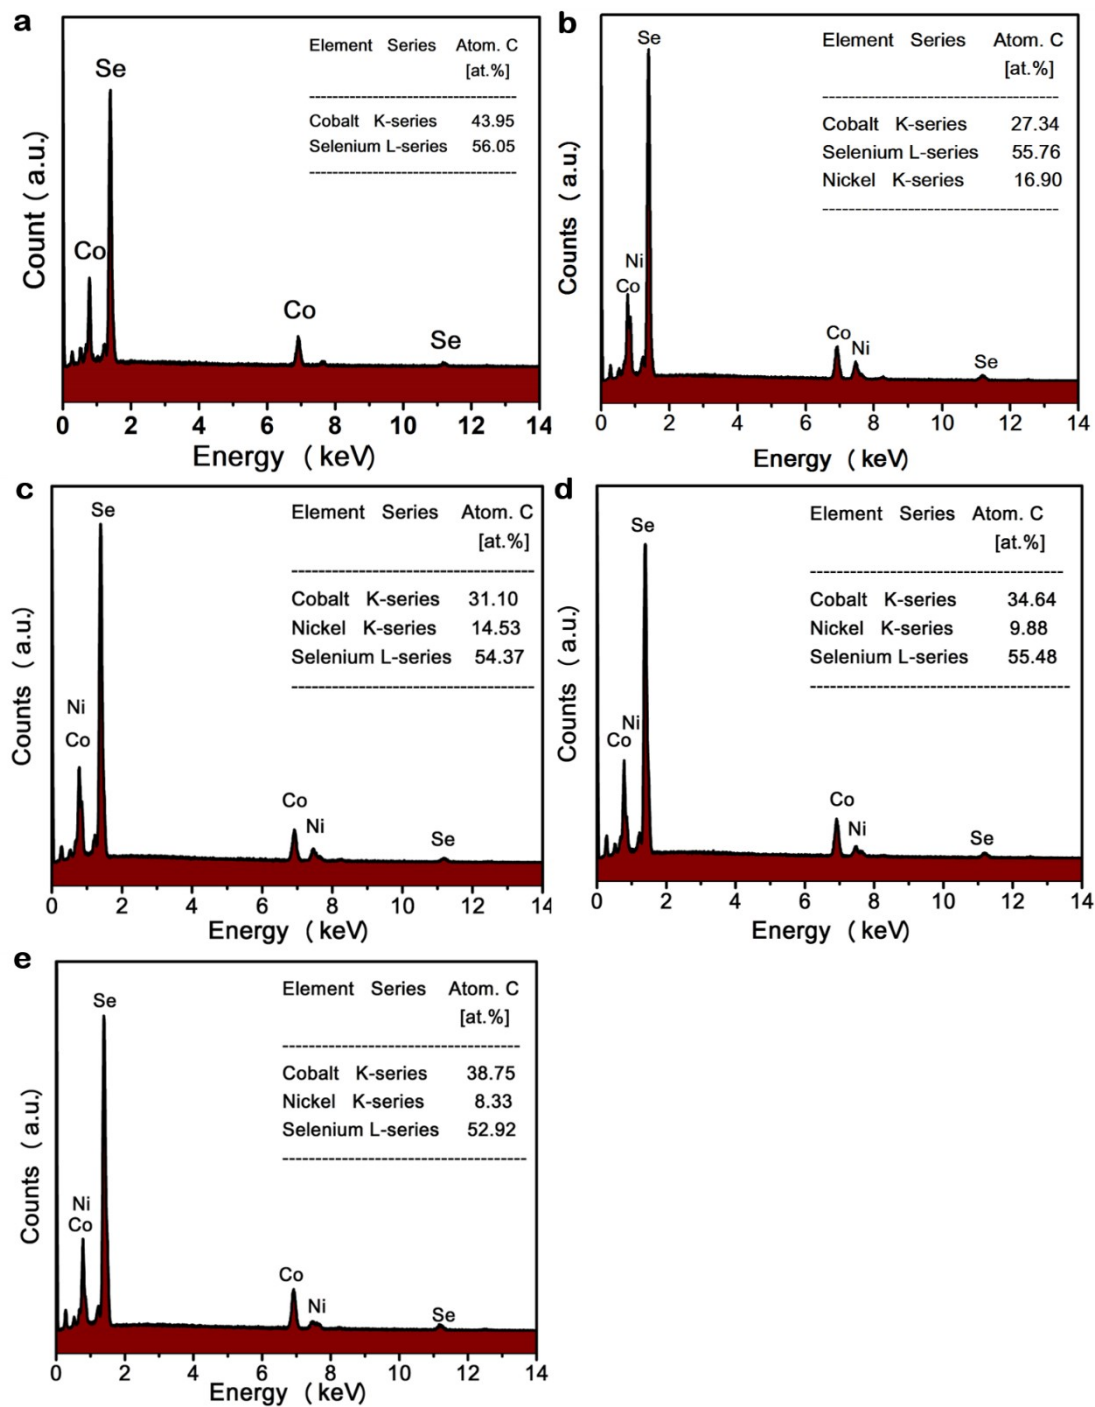

Fig. S3. EDX images of different samples. (a)  $\text{Co}_3\text{Se}_4$ , (b)  $\text{Ni}_{1.14}\text{Co}_{1.86}\text{Se}_4$ , (c)  $\text{Ni}_{0.95}\text{Co}_{2.05}\text{Se}_4$ , (d)  $\text{Ni}_{0.67}\text{Co}_{2.33}\text{Se}_4$ , (e)  $\text{Ni}_{0.53}\text{Co}_{2.47}\text{Se}_4$ .

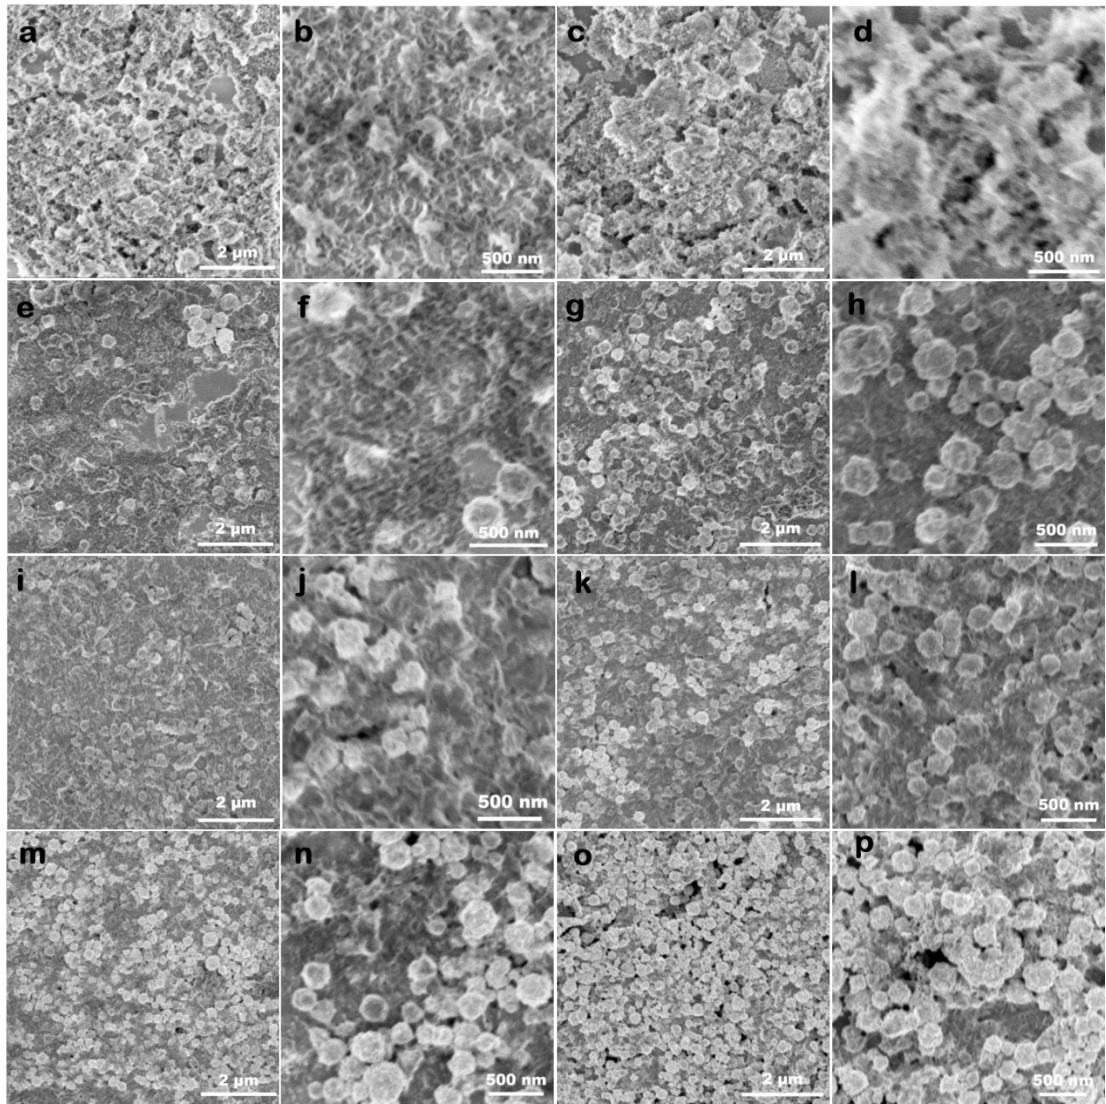

Fig. S4. SEM images of  $\text{Ni}_{0.95}\text{Co}_{2.05}\text{Se}_4$  samples at different experimental conditions. (a-b) 100 °C, (c-d) 120 °C, (e-f) 140 °C, (g-h) 160 °C, (i-j) 1 h, (k-l) 3 h, (m-n) 6 h, (o-p) 9 h.

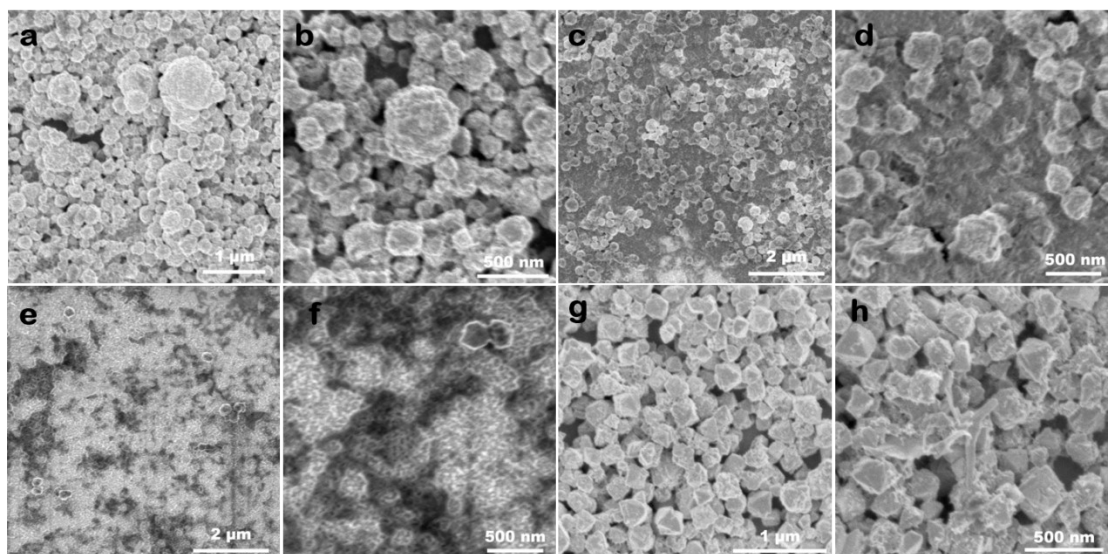

Fig. S5. SEM images of  $\text{Ni}_{0.95}\text{Co}_{2.05}\text{Se}_4$  samples at different experimental conditions. (a-b) without cyclohexane, (c-d) without ethylene glycol, (e-f) without cyclohexane and ethylene glycol, (g-h) the ratio of nickel to cobalt is 2.2:1.

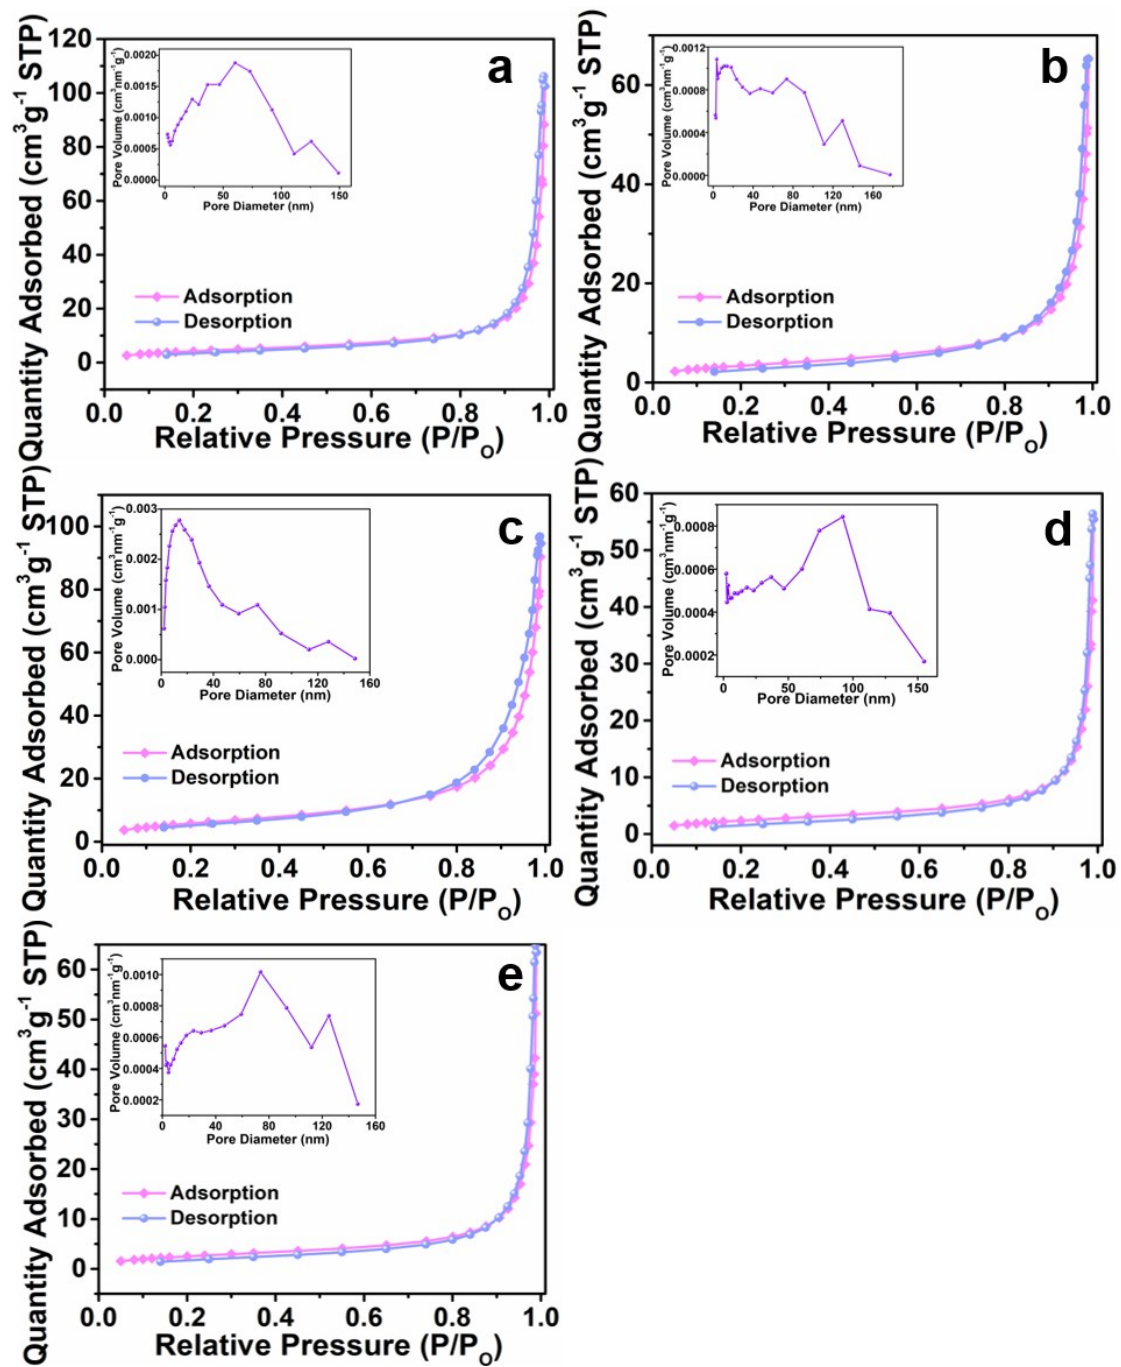

Fig. S6.  $N_2$  sorption isotherms and the pore size distribution of different samples. (a)  $\text{Co}_3\text{Se}_4$ , (b)  $\text{Ni}_{1.14}\text{Co}_{1.86}\text{Se}_4$ , (c)  $\text{Ni}_{0.95}\text{Co}_{2.05}\text{Se}_4$ , (d)  $\text{Ni}_{0.67}\text{Co}_{2.33}\text{Se}_4$ , (e)  $\text{Ni}_{0.53}\text{Co}_{2.47}\text{Se}_4$ .

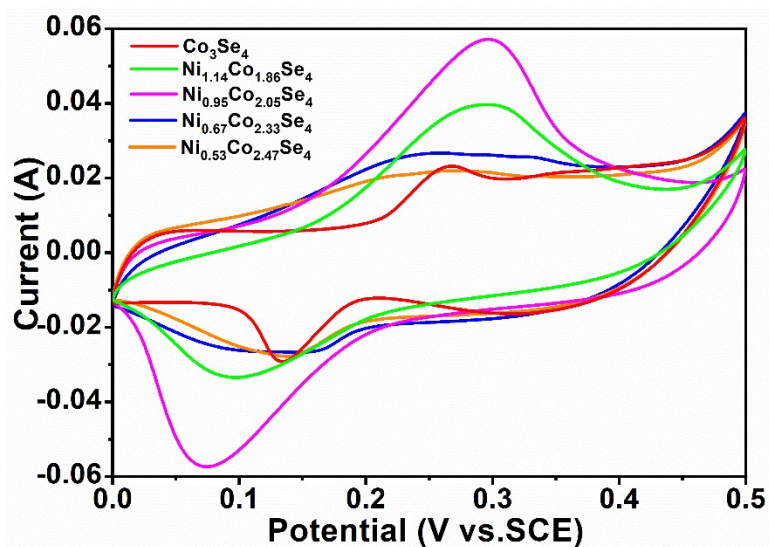

Fig. S7. CV curves of different proportions at the scanning speed of  $20 \text{ mV s}^{-1}$ .

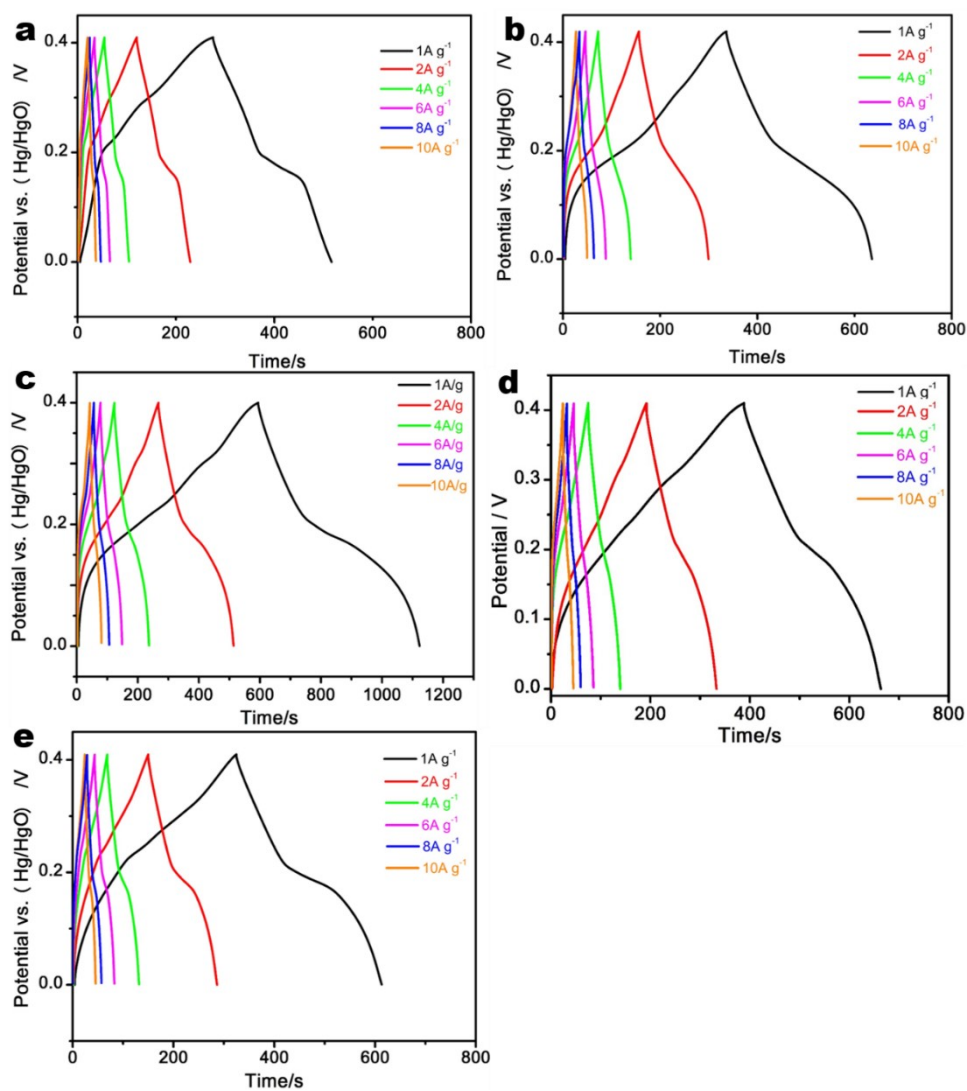

Fig. S8. GCD curves of different samples (a)  $\text{Co}_3\text{Se}_4$ , (b)  $\text{Ni}_{1.14}\text{Co}_{1.86}\text{Se}_4$ , (c)  $\text{Ni}_{0.95}\text{Co}_{2.05}\text{Se}_4$ , (d)  $\text{Ni}_{0.67}\text{Co}_{2.33}\text{Se}_4$ , (e)  $\text{Ni}_{0.53}\text{Co}_{2.47}\text{Se}_4$ .



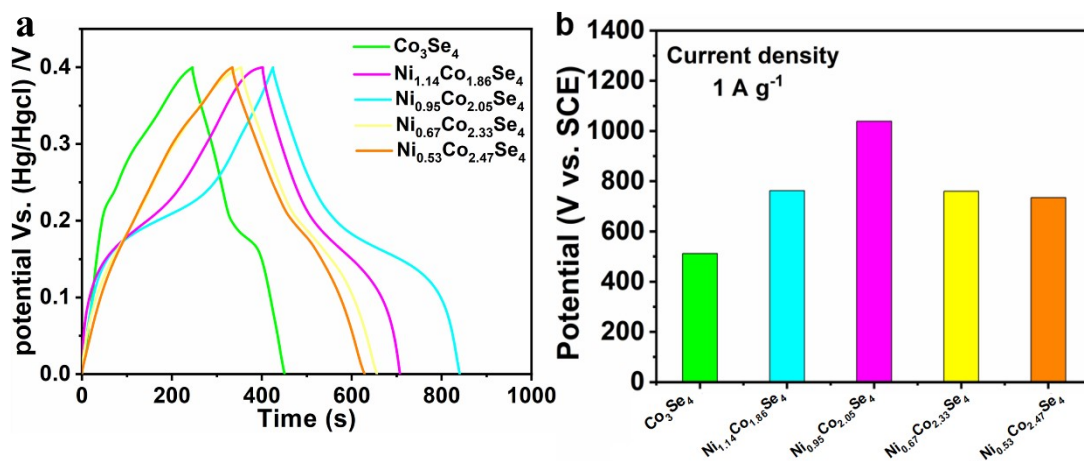

Fig. S9. GCD curves and capacity histogram of different samples at 1 A g<sup>-1</sup> current density.

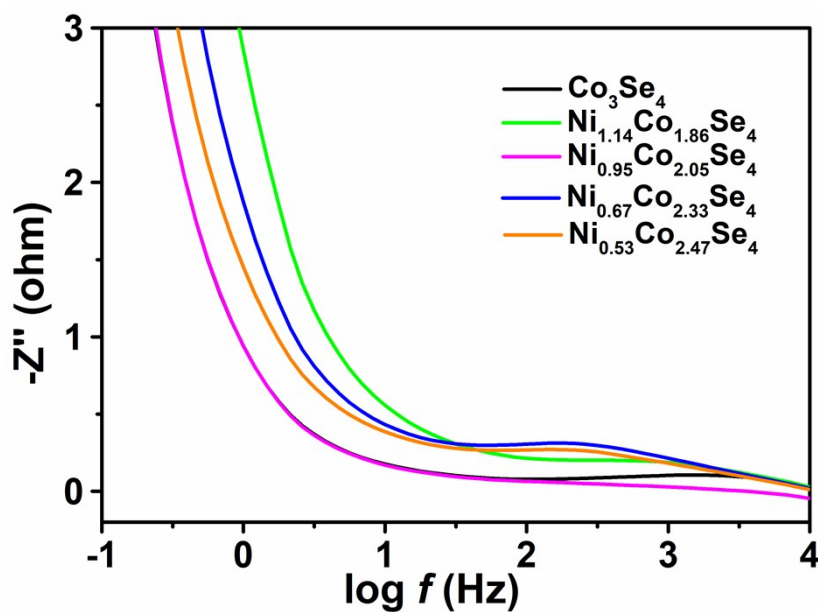

Fig. S10. Bode plot of (a) Co<sub>3</sub>Se<sub>4</sub>, (b) Ni<sub>1.14</sub>Co<sub>1.86</sub>Se<sub>4</sub>, (c) Ni<sub>0.95</sub>Co<sub>2.05</sub>Se<sub>4</sub>, (d) Ni<sub>0.67</sub>Co<sub>2.33</sub>Se<sub>4</sub>, (e) Ni<sub>0.53</sub>Co<sub>2.47</sub>Se<sub>4</sub>.

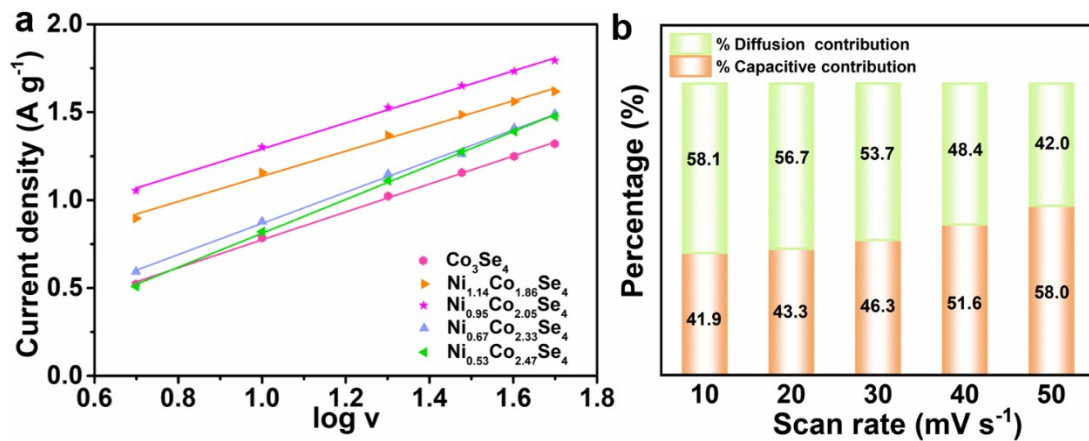

Fig. S11. (a) the fitting plots of log (current peak) versus log (scan rate) at oxidation peak of the series  $\text{Ni}_x\text{Co}_{3-x}\text{Se}_4$  samples, (b) the diffusion and capacitive contribution of  $\text{Ni}_{0.95}\text{Co}_{2.05}\text{Se}_4$  electrode at different scan rates.

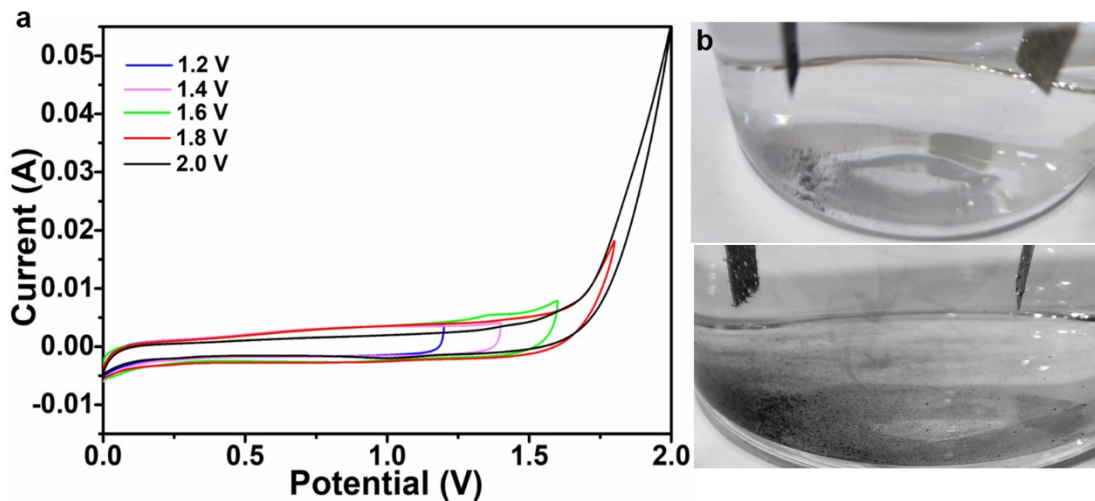

Fig. S12. (a) CV curves at different voltage windows of  $\text{Ni}_{0.95}\text{Co}_{2.05}\text{Se}_4//\text{AC}$ , (b) electrode conditions after CV testing at 1.8V and 2.0V.

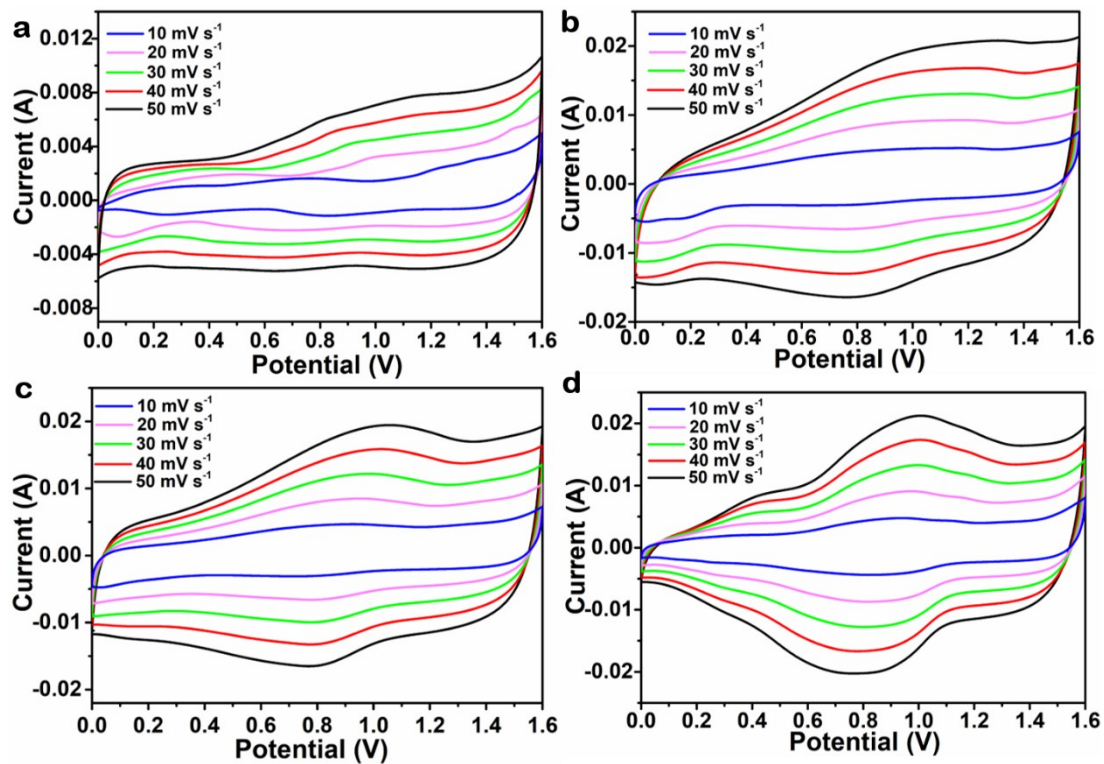

Fig. S13. CV curves of different samples (a)  $\text{Co}_3\text{Se}_4$ , (b)  $\text{Ni}_{1.14}\text{Co}_{1.86}\text{Se}_4$ , (c)  $\text{Ni}_{0.67}\text{Co}_{2.33}\text{Se}_4$ , (d)  $\text{Ni}_{0.53}\text{Co}_{2.47}\text{Se}_4$ .

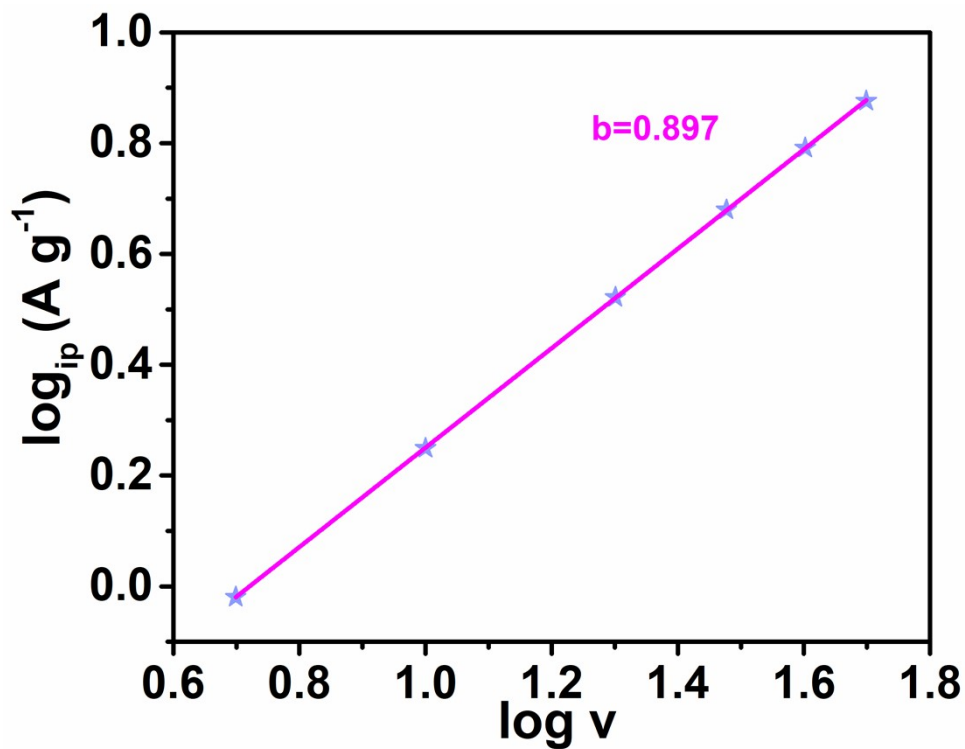

Fig. S14. Log (i) vs log (v) plots of  $\text{Ni}_{0.95}\text{Co}_{2.05}\text{Se}_4//\text{AC}$  electrode.

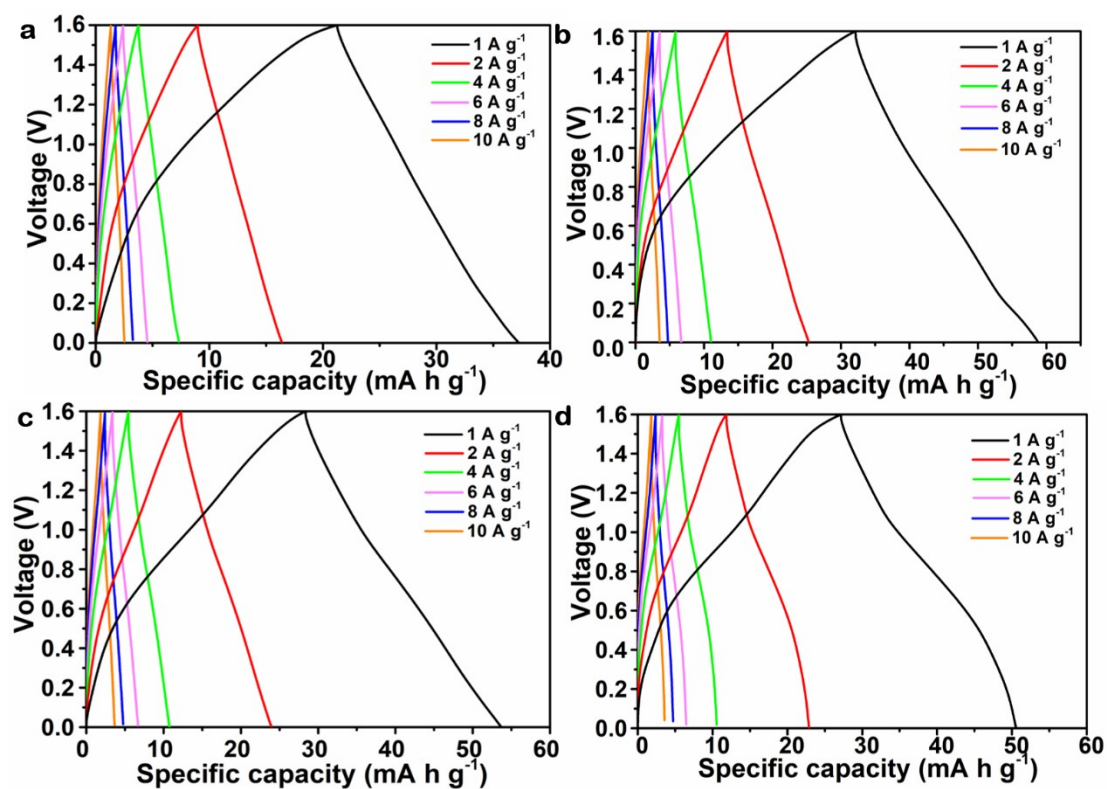

Fig. S15. GCD curves of different samples (a)  $\text{Co}_3\text{Se}_4//\text{AC}$ , (b)  $\text{Ni}_{1.14}\text{Co}_{1.86}\text{Se}_4//\text{AC}$ , (c)  $\text{Ni}_{0.67}\text{Co}_{2.33}\text{Se}_4//\text{AC}$ , (d)  $\text{Ni}_{0.53}\text{Co}_{2.47}\text{Se}_4//\text{AC}$ .

Table S1. Different sample sizes and average sizes.

| Sample names                                  | Max/Min sizes (nm) | Average sizes |
|-----------------------------------------------|--------------------|---------------|
| $\text{Co}_3\text{Se}_4$                      | 261.36/143.86      | 190.56        |
| $\text{Ni}_{1.14}\text{Co}_{1.86}\text{Se}_4$ | 288.98/145.40      | 213.10        |
| $\text{Ni}_{0.95}\text{Co}_{2.05}\text{Se}_4$ | 256.94/124.78      | 193.85        |
| $\text{Ni}_{0.67}\text{Co}_{2.33}\text{Se}_4$ | 400.26/167.59      | 242.89        |
| $\text{Ni}_{0.53}\text{Co}_{2.47}\text{Se}_4$ | 299.10/141.81      | 222.28        |

Table S2. The fitting values resistance of these samples.

| Sample names                                  | $R_s$ ( $\Omega$ ) | $R_{ct}$ ( $\Omega$ ) | $D(\text{cm}^2 \text{s}^{-1})$ |
|-----------------------------------------------|--------------------|-----------------------|--------------------------------|
| $\text{Co}_3\text{Se}_4$                      | 1.142              | 0.677                 | $3.694 \times 10^{-9}$         |
| $\text{Ni}_{1.14}\text{Co}_{1.86}\text{Se}_4$ | 0.717              | 1.735                 | $1.098 \times 10^{-9}$         |
| $\text{Ni}_{0.95}\text{Co}_{2.05}\text{Se}_4$ | 1.011              | 0.242                 | $4.843 \times 10^{-9}$         |
| $\text{Ni}_{0.67}\text{Co}_{2.33}\text{Se}_4$ | 0.947              | 0.433                 | $3.673 \times 10^{-9}$         |
| $\text{Ni}_{0.53}\text{Co}_{2.47}\text{Se}_4$ | 0.927              | 0.339                 | $9.260 \times 10^{-10}$        |

Table S3. The comparison of electrochemical performances between Ni-Co selenide electrodes with the reported selenide related electrodes.

| Materials                                             | Specific capacity,<br>F g <sup>-1</sup> /Cycle numbers,<br>(Current density, A g <sup>-1</sup> ) | Voltage<br>(V) | Electrolyte<br>concentration<br>(KOH, mol) | Reference |
|-------------------------------------------------------|--------------------------------------------------------------------------------------------------|----------------|--------------------------------------------|-----------|
| H-NiCoSe <sub>2</sub><br>sub-microspheres             | 608 /5000 <sup>th</sup> , (10)                                                                   | 0.5            | 6                                          | S1        |
| GeSe <sub>2</sub>                                     | 297.9 /2000 <sup>th</sup> , (1)                                                                  | 0.1-0.65       | 1                                          | S2        |
| Ni-Co-Se-2                                            | 382.33<br>/2000 <sup>th</sup> , (5)                                                              | 0.6            | 6                                          | S3        |
| NiCo <sub>2.1</sub> Se <sub>3.3</sub> NSs/3D<br>G/NF  | 395.36 /1000 <sup>th</sup> ,<br>(10A cm <sup>-2</sup> )                                          | 0.6            | 6                                          | S4        |
| Ni <sub>0.5</sub> Co <sub>0.5</sub> Se <sub>2</sub>   | 1007/3500 <sup>th</sup> , (7)                                                                    | 0.55           | 6                                          | S5        |
| Co <sub>3</sub> Se <sub>4</sub>                       | 426.75/4000 <sup>th</sup> , (4)                                                                  | 0.5            | 2                                          |           |
| Ni <sub>1.14</sub> Co <sub>1.86</sub> Se <sub>4</sub> | 493.47/4000 <sup>th</sup> , (4)                                                                  | 0.5            | 2                                          |           |
| Ni <sub>0.95</sub> Co <sub>2.05</sub> Se <sub>4</sub> | 625.27/4000 <sup>th</sup> , (4)                                                                  | 0.5            | 2                                          | This work |
| Ni <sub>0.67</sub> Co <sub>2.33</sub> Se <sub>4</sub> | 468.2/4000 <sup>th</sup> , (4)                                                                   | 0.5            | 2                                          |           |
| Ni <sub>0.53</sub> Co <sub>2.47</sub> Se <sub>4</sub> | 561.44/4000 <sup>th</sup> , (4)                                                                  | 0.5            | 2                                          |           |

### Supplementary References

1. L. R. Hou, Y. Y. Shi, C. Wu, Y. R. Zhang, Y. Z. Ma, X. Sun, J. F. Sun, X. G. Zhang and C. Z. Yuan, Monodisperse Metallic NiCoSe<sub>2</sub> Hollow Sub-Microspheres: Formation Process, Intrinsic Charge-Storage Mechanism, and Appealing Pseudocapacitance as Highly Conductive Electrode for Electrochemical Supercapacitors, *Adv. Funct. Mater.*, 2018, 28, 1705921.
2. X. F. Wang, B. Liu, Q. F. Wang, W. F. Song, X. J. Hou, D. Chen, Y. B. Cheng, G. Z. Shen, Three-dimensional hierarchical GeSe<sub>2</sub> nanostructures for high performance flexible all-solid-state supercapacitors, *Adv. Mater.*, 2013, 25, 1479-1486.

3. S. Li, Y. J. Ruan, Q. Xie, Morphological modulation of NiCo<sub>2</sub>Se<sub>4</sub> nanotubes through hydrothermal selenization for asymmetric supercapacitor, *Electrochim. Acta*, 2020, 356, 136837.
4. Y. X. Wang, W. J. Zhang, X. L. Guo, K. Jin, Z. T. Chen, Y. Y. Liu, L. L. Yin, L. Li, K.B. Yin, L. T. Sun, Y. H. Zhao, Ni-Co selenide nanosheet/3D graphene/nickel foam binder-free electrode for high-performance supercapacitor, *ACS Appl Mater. Interfaces*, 2019, 11, 7946-7953.
5. X. X. Song, C. H. Huang, Y. L. Qin, H. L. Li, H. C. Chen, Hierarchical hollow, sea-urchin-like and porous Ni<sub>0.5</sub>Co<sub>0.5</sub>Se<sub>2</sub> as advanced battery material for hybrid supercapacitors, *J. Mater. Chem. A*, 2018, 6, 16205-16212.
